# Supplementary material for: Active learning driven prioritisation of compounds from on-demand libraries targeting the SARS-CoV-2 main protease
Source: Royal Society of Chemistry journal article supplement (doi:10.1039/d4dd00343h), 2025-01-01
Supplement: d4dd00343h1.pdf [file d4dd00343h1.pdf]

**Supplementary Information for:**  
**Active learning driven prioritisation of**  
**compounds from on-demand libraries targeting**  
**the SARS-CoV-2 main protease**

Ben Cree,<sup>a</sup> Mateusz K. Bieniek, Siddique Amin, Akane Kawamura, and Daniel J.  
Cole\*

*School of Natural and Environmental Sciences, Newcastle University, Newcastle upon Tyne  
NE1 7RU, United Kingdom*

E-mail: daniel.cole@ncl.ac.uk

---

<sup>a</sup>B.C. and M.K.B. contributed equally to this work.

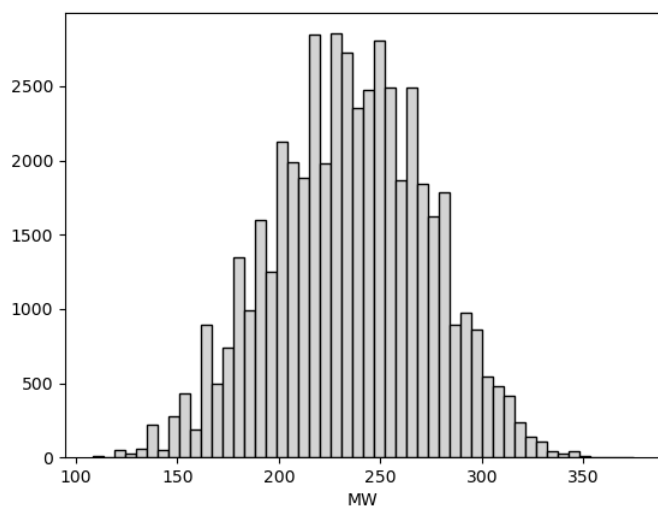

Figure S1: Distribution of molecular weights (MW, Da) for the 47 K compound oracle dataset.

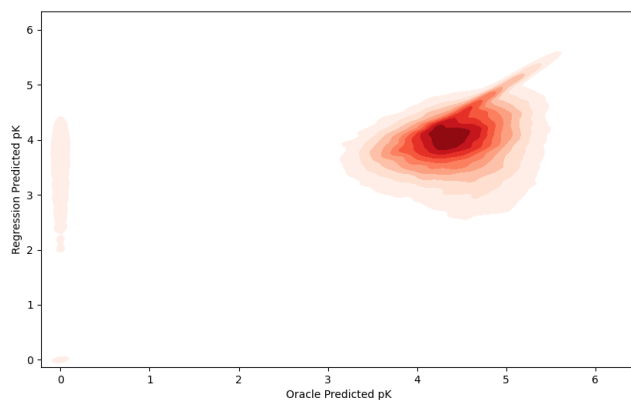

Figure S2: Correlation between the predicted pK using a Gaussian process regression model and the oracle predictions. Overall RMSE between the predictions is 0.97 pK units. (Cycle size = 200, diverse initial selection of molecules, UCB acquisition function,  $\beta = 10$ ).

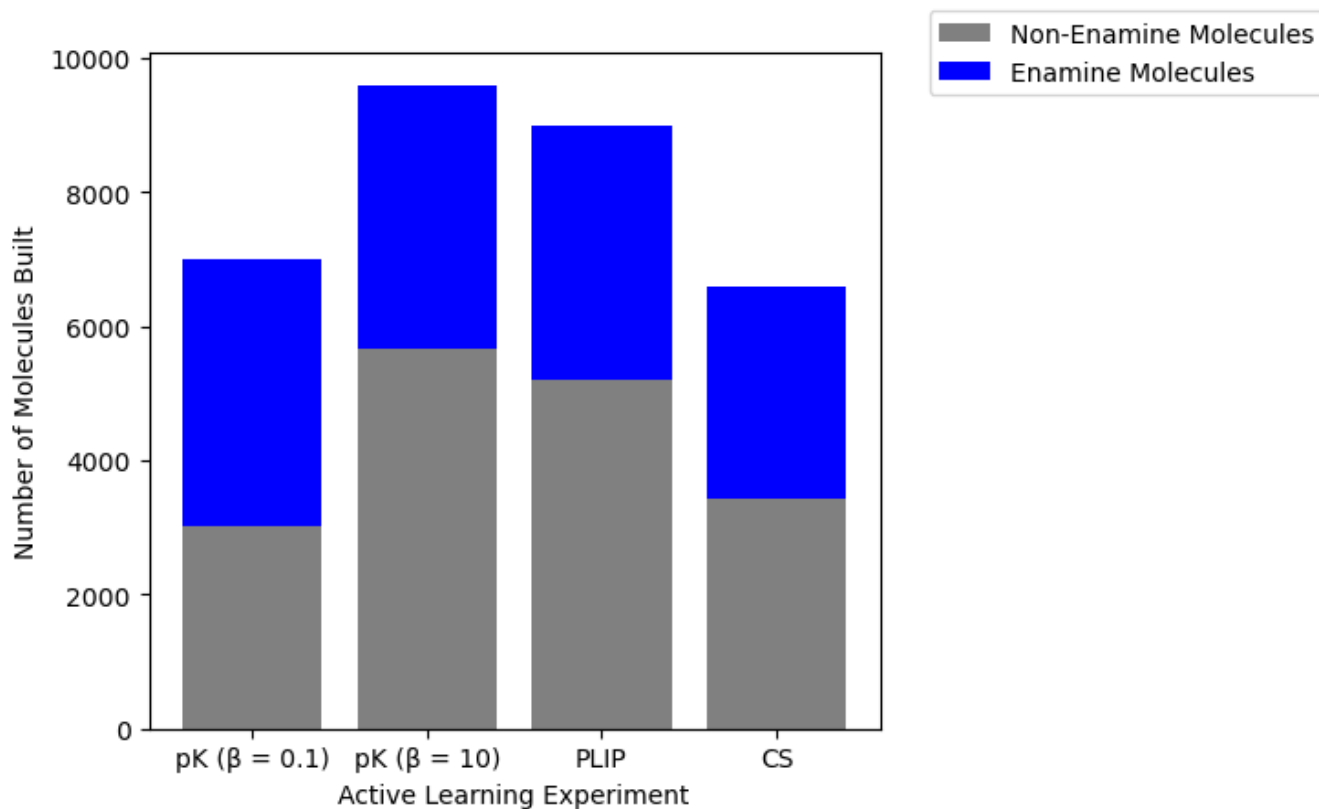

Figure S3: Histogram of the number of Enamine molecules added for each experiment, as a fraction of the total number of molecules built.

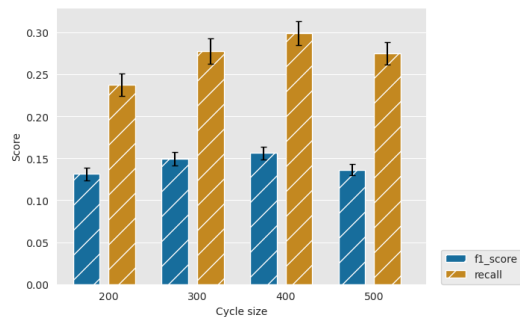

(a) Top 2% activity

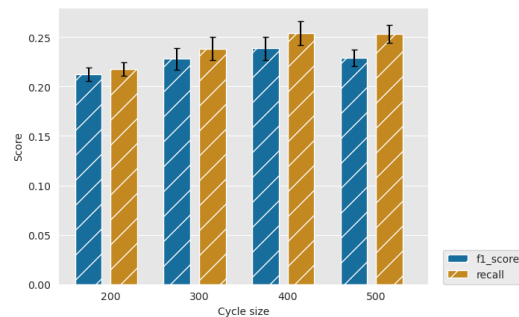

(b) Top 5% activity

Figure S4: F1/recall for Experiment: Random initial molecule selection, GBM regression model and greedy acquisition at 2 and 5 % as a function of different cycle sizes.

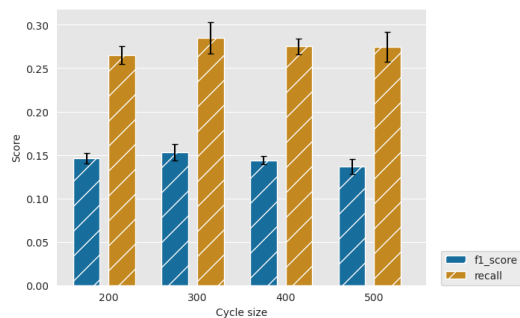

(a) Top 2% activity

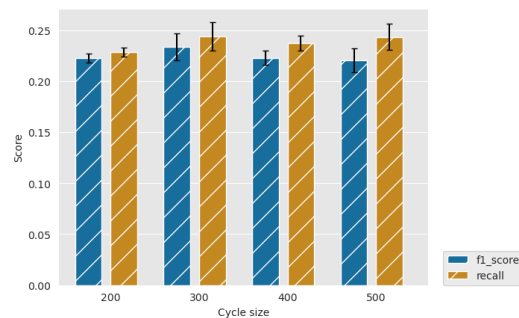

(b) Top 5% activity

Figure S5: F1/recall for Experiment: Diverse (MaxMin) initial molecule selection, GBM regression model and greedy acquisition at 2 and 5 % as a function of different cycle sizes.

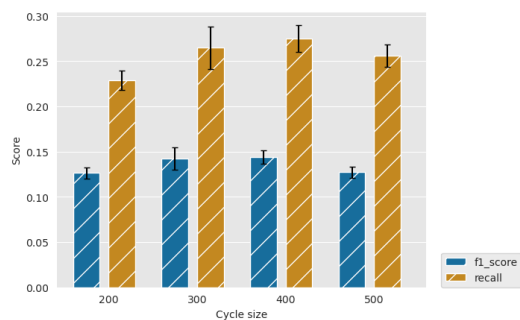

(a) Top 2% activity

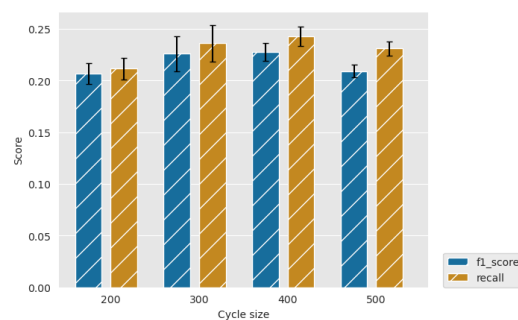

(b) Top 5% activity

Figure S6: F1/recall for Experiment: Random initial molecule selection, GP regression model and greedy acquisition at 2 and 5 % as a function of different cycle sizes.

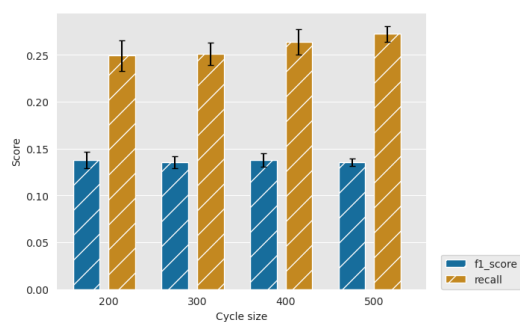

(a) Top 2%

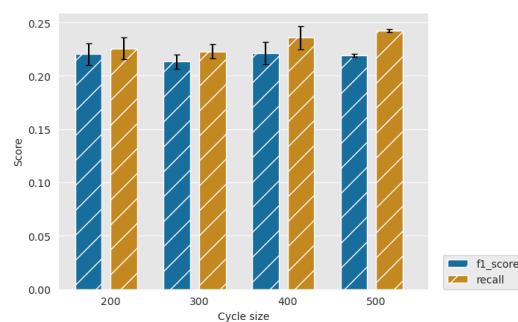

(b) Top 5%

Figure S7: F1/recall for Experiment: Diverse (MaxMin) initial molecule selection, GP regression model and greedy acquisition at 2 and 5 % as a function of different cycle sizes.

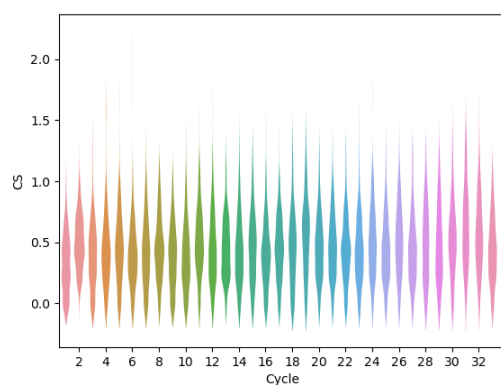

Figure S8: Active learning drives improvements in predicted CS scoring function. A GP model is used, with UCB acquisition function ( $\beta = 0.1$ ), a cycle size of 200 and a diverse set of starting compounds.

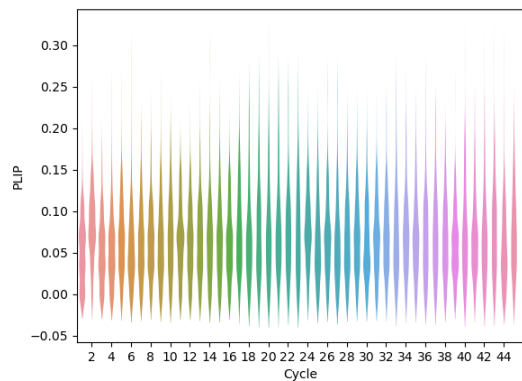

Figure S9: Active learning drives improvements in predicted PLIP scoring function. A GP model is used, with UCB acquisition function ( $\beta = 0.1$ ), a cycle size of 200 and a diverse set of starting compounds.

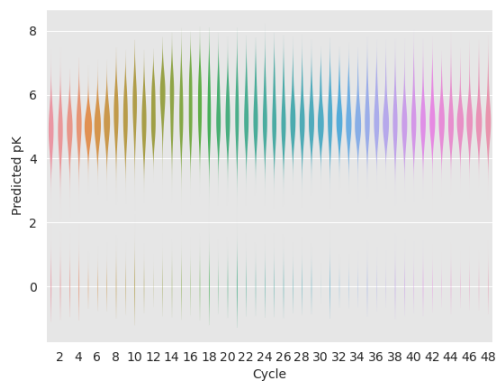

Figure S10: Active learning drives improvements in predicted binding affinity scoring function. A GP model is used, with UCB acquisition function ( $\beta = 10$ ), a cycle size of 200 and a diverse set of starting compounds.

# Supplementary Note 1

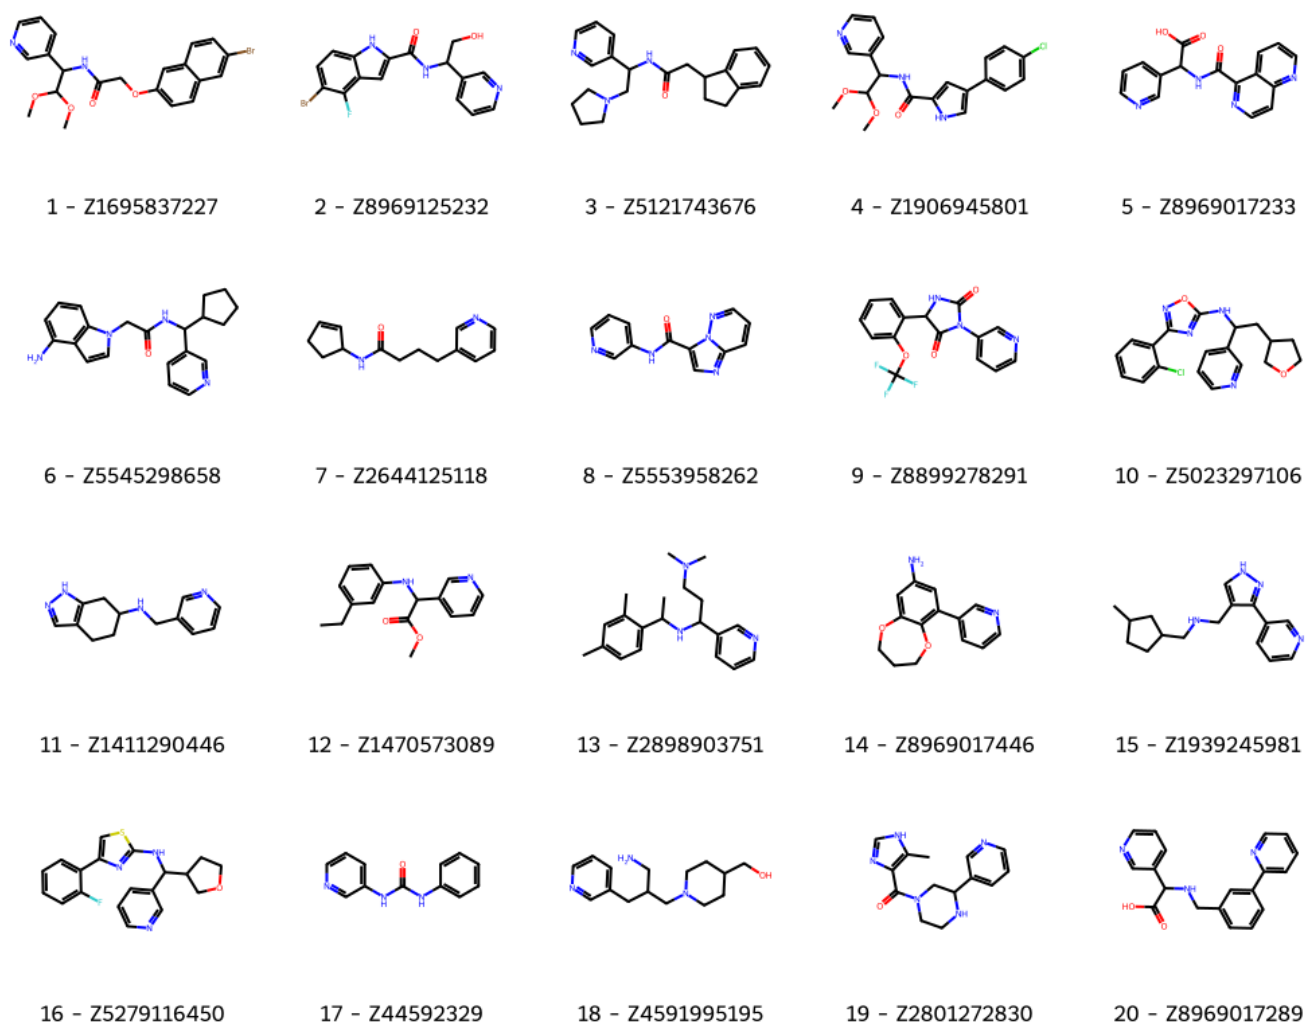

Figure S11: 2D structures of the Enamine compounds ordered, along with their compound number and Enamine IDs. Note that compound **17** is a control compound taken from a previous study.<sup>1</sup>

## Experimental

### Protein Production and Purification

Recombinant His-tagged Mpro was produced as described<sup>2</sup> in *E. coli* BL21 (DE3) containing pGEX-6P-1 Mpro plasmid. A 50 mL starter culture was inoculated and grown with

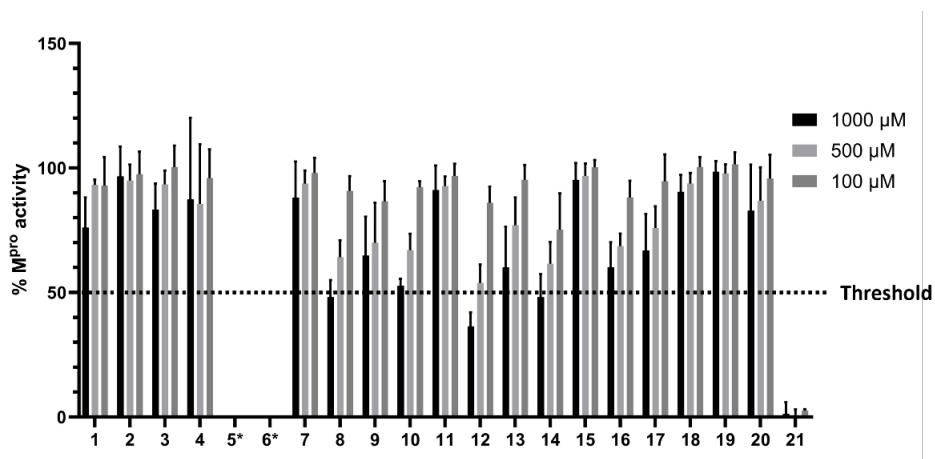

Figure S12: Initial compound screening for inhibition of Mpro enzyme activity. Compounds were tested for inhibition of Mpro catalytic activity at concentrations of 1000  $\mu\text{M}$ , 500  $\mu\text{M}$  and 100  $\mu\text{M}$ . Compounds **17** and **21** were included as controls. Compounds **12** and **14** reduced the Mpro activity below the threshold ( $\leq 50\%$  Mpro activity) at 1000  $\mu\text{M}$  and were selected for subsequent IC<sub>50</sub> analysis. **8** was not chosen for further analysis due to background auto-fluorescent activity. Data represented as mean  $\pm$  SD; 2 biological repeats consisting of 3 technical replicates. 10 consists of 1 biological repeat with 3 technical replicates. Conditions: Mpro (0.2  $\mu\text{M}$ ) 12-hour pre-incubation with compounds, 20  $\mu\text{M}$  fluorescent substrate, 50 mM Tris-HCl (pH 7.3), 1 mM EDTA and temp: 25°C. Compounds **5** and **6** were excluded from the analysis due to poor solubility in assay conditions.



carbenicillin (100  $\mu\text{g}/\text{mL}$ ) in LB broth for 8 hours at at 37 °C with shaking (200 RPM). The expression media (1 L Formedium LB autoinduction media + 10 mL glycerol in a 2.5 L baffled Erlenmeyer flask) was inoculated with 10 mL of the starter culture and grown at 37 °C with carbenicillin (100  $\mu\text{g}/\text{mL}$ ) at 200 RPM until reaching an OD600 of 0.6. Cells were further incubated for 16 h at 18°C, harvested by centrifugation (8000 g, 10 min) and pellets were frozen at -80 °C. The frozen pellet (12 g) was re-suspended in lysis buffer [50 mM Tris, 300 mM NaCl, pH 8] before being lysed by sonication for 6 mins (5s on, 20s off cycle, 40 % AMP, Sonics VCX-500) twice before subsequent centrifugation (50,000 g, 30 min). The cell lysate was filtered in a 0.45  $\mu\text{m}$  syringe filter and added to a 3 mL bed volume Nickel Sepharose gravity flow column pre-equilibrated with lysis buffer. The column was washed with 72 mL wash buffer [50 mM Tris, 300 mM NaCl, 25 mM imidazole, pH 8] and eluted with 12 mL elution buffer [50 mM Tris, 300 mM NaCl, 500 mM imidazole, pH 8] and collected as 3 mL fractions. Protein-containing fractions were combined and concentrated using a 10 kDa molecular weight cut off concentrator (Amicon Ultra), and subsequently purified by size-exclusion chromatography using a gel filtration column (HiLoad 16/600 Superdex 75pg) on AKTA Pure system in SEC buffer [50 mM Tris, 300 mM NaCl, pH 8]. His-tagged Mpro-containing fractions (>90 % purity by 10 % SDS PAGE gel) were concentrated (478.7  $\mu\text{M}$ ), aliquoted and stored at -80 °C.

### **Fluorescent Activity Assay**

Mpro fluorescent substrate peptide (MCA-AVLQSGFR-Lys(Dnp)-Lys-NH<sub>2</sub>) was purchased from GL Biochem. All assays were performed as described<sup>3</sup> in black 384-well microplates (Greiner Bio-One). Concentrations reported as used in the final assay volume of 30  $\mu\text{L}$ . Compound dilutions were prepared in assay buffer [50 mM Tris-HCl, 1mM EDTA, pH 7.3] with 3 % DMSO (1 % DMSO final). 10  $\mu\text{L}$  compound was incubated with 10  $\mu\text{L}$  Mpro (0.2  $\mu\text{M}$  final) for 30 min at 25 °C before addition of 10  $\mu\text{L}$  of the fluorescent substrate peptide (20  $\mu\text{M}$  final). Fluorescence (330 nm excitation / 390 nm emission) after 20.5 min (at linear

range) at 25 °C (BMG Pherastar FSX) was used to calculate the IC<sub>50</sub> values. Background fluorescence of compounds **4**, **7**, **8**, **11**, **16** and **21** was subtracted from the raw datapoints. Datapoints were normalised to DMSO control (maximum Mpro activity) and no enzyme control and presented as ‘% Mpro activity’. Analysis was performed on GraphPad Prism V10 fitted with the model ‘log(inhibitor) vs. normalized response, variable slope’. All assays were performed twice in technical triplicates unless stated otherwise.

## Supplementary References

- (1) Boby, M. L. et al. Open science discovery of potent noncovalent SARS-CoV-2 main protease inhibitors. *Science* **2023**, *382*, eabo7201.
- (2) Douangamath, A. et al. Crystallographic and electrophilic fragment screening of the SARS-CoV-2 main protease. *Nature Communications* **2020**, *11*, 5047.
- (3) Jin, Z. et al. Structure of Mpro from SARS-CoV-2 and discovery of its inhibitors. *Nature* **2020**, *582*, 289–293.
